# Supplementary material for: Extracts of Fruits and Plants Cultivated In Vitro of Aristotelia chilensis (Mol.) Stuntz Show Inhibitory Activity of Aldose Reductase and Pancreatic Alpha-Amylase Enzymes
Source: MDPI journal article supplement (doi:10.3390/plants11202772), 2022-10-20
Supplement: s1 [file s1]

## 5. Supplementary material

Fruit

*In vitro* plant

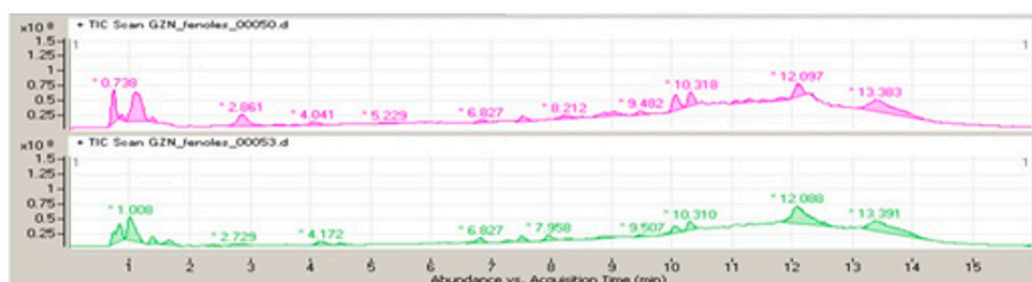

**Figure S1.** LC-MS/MS chromatogram in positive ionization mode for aqueous extracts of *A. chilensis*. Minutes 1 to 15.

Fruit

*In vitro* plant

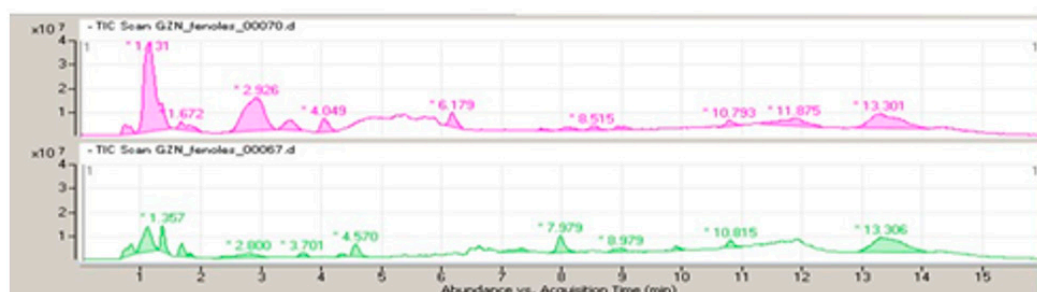

**Figure S2.** LC-MS/MS chromatogram in negative ionization mode for aqueous extracts of *A. chilensis*. Minutes 1 to 15.
